# Supplementary material for: A Single LC-MS/MS Analysis to Quantify CoA Biosynthetic Intermediates and Short-Chain Acyl CoAs
Source: MDPI journal article supplement (doi:10.3390/metabo11080468), 2021-07-21
Supplement: s1 [file s1]

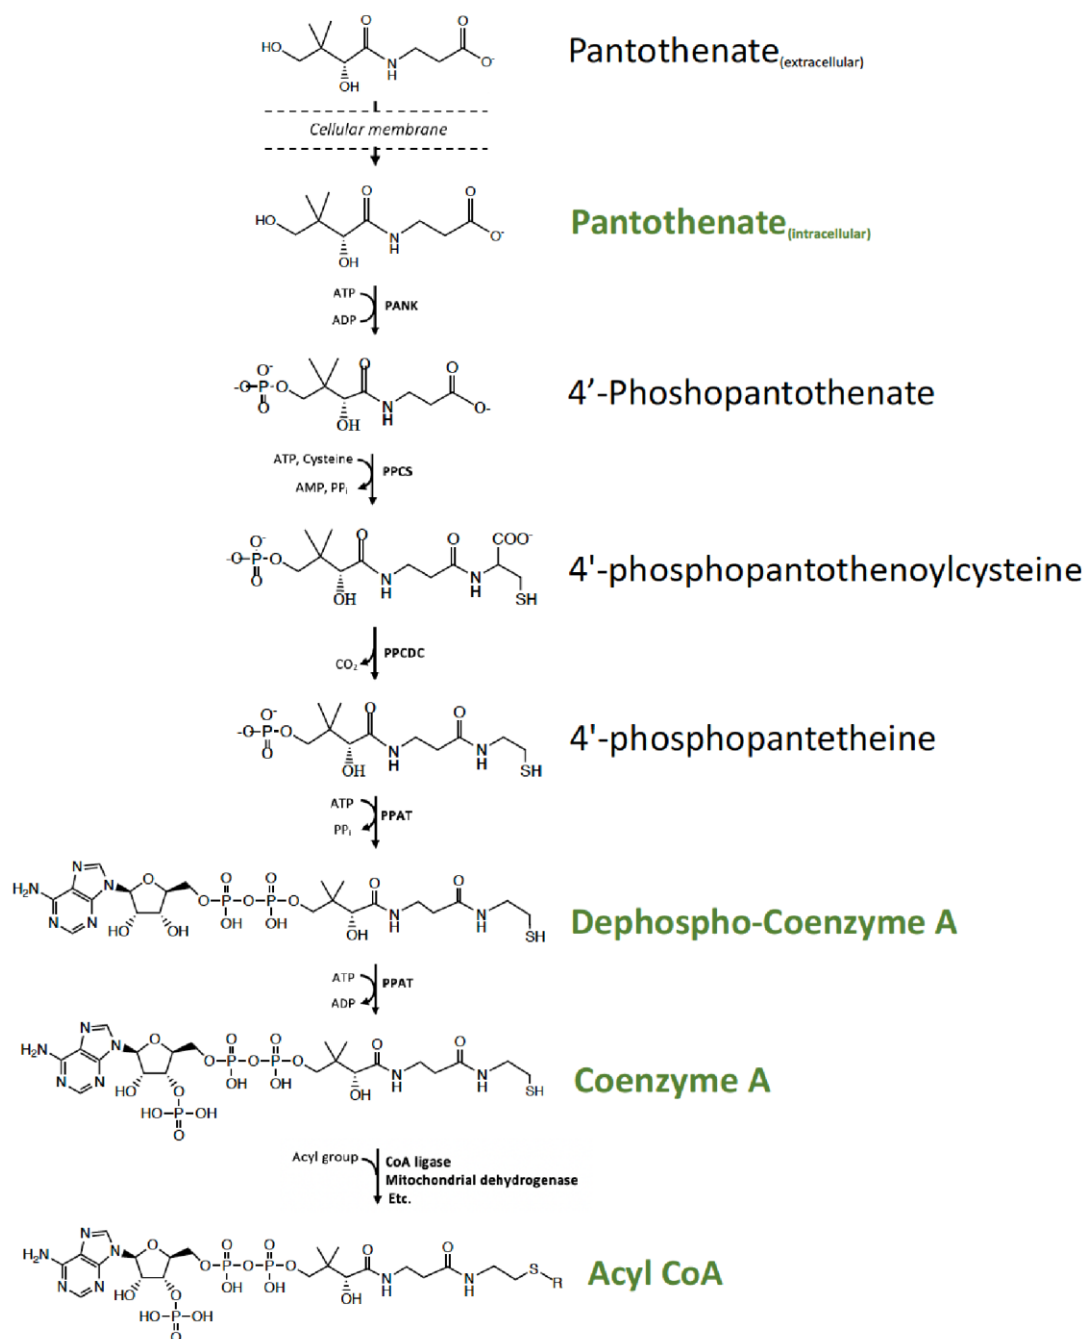

**Figure S1.** The CoA biosynthetic pathway with corresponding structures: As in Figure 1, the metabolites detected by the method detailed in this manuscript are highlighted in green. PANK, pantothenate kinase; PPCS, phosphopantothenoylcysteine synthase; PPCDC, phosphopantothenoylcysteine decarboxylase; PPAT, phosphopantetheine adenylyl transferase; DPCK, dephosphocoenzyme A kinase. The bifunctional enzyme Coenzyme A synthase (COASY) is comprised of PPAT and DPCK.

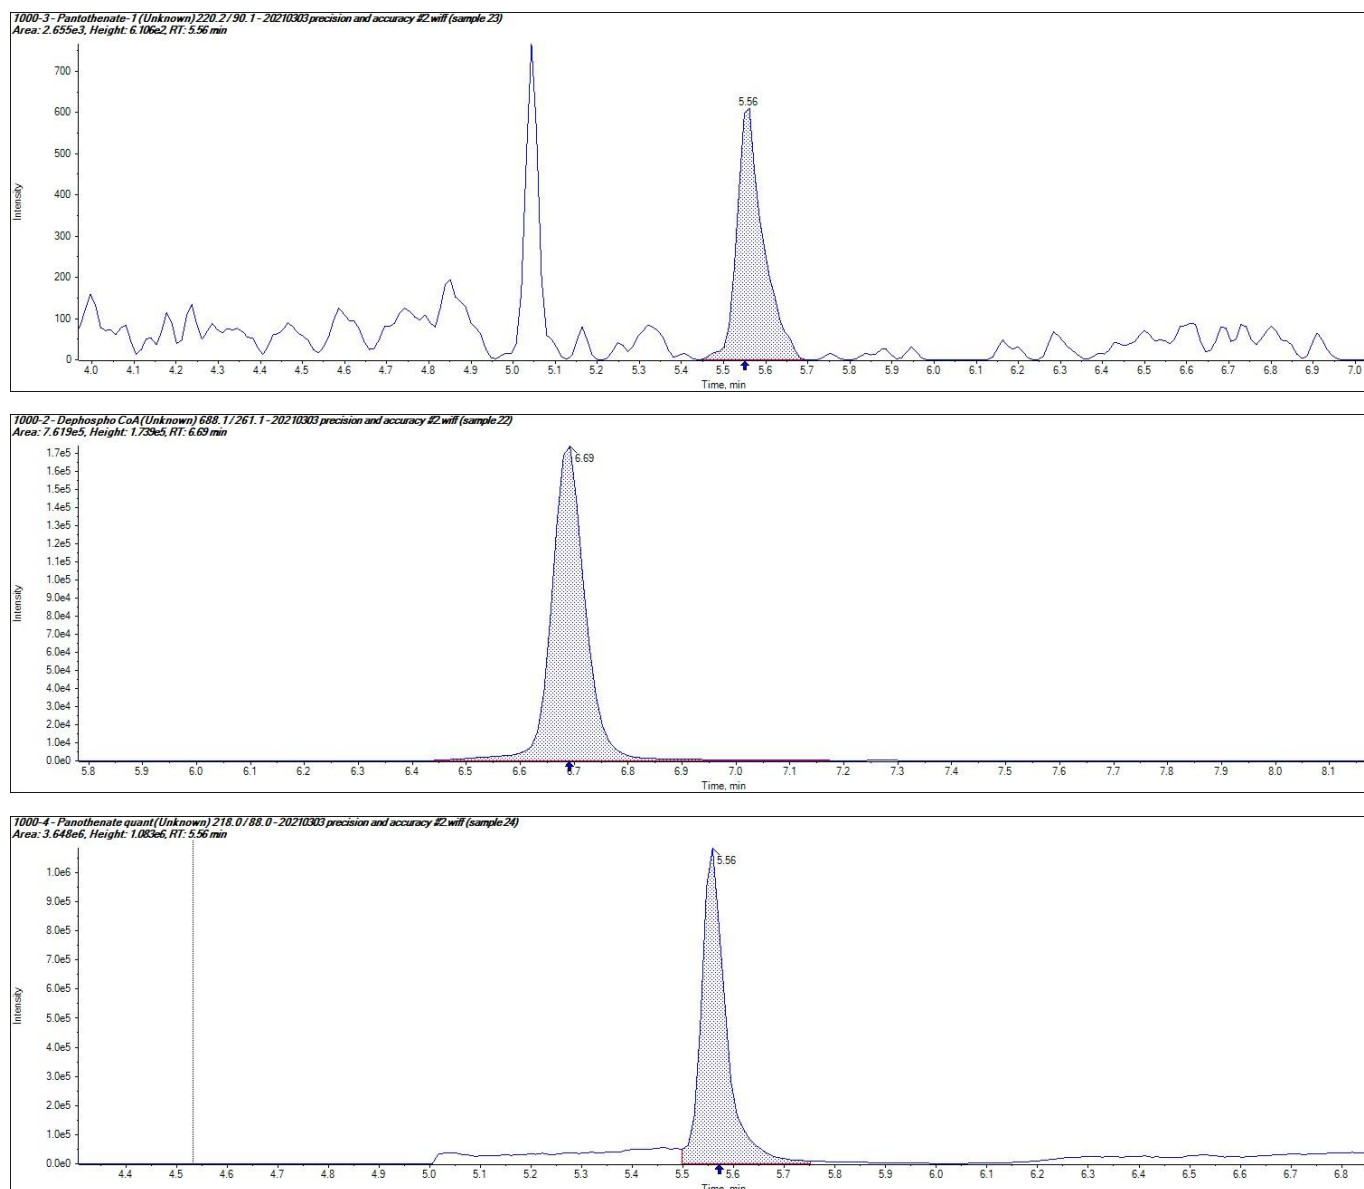

**Figure S2.** Pantothenate is only detectable with adequate sensitivity with negative-mode MRM: (*Top*) Pantothenate analyzed with positive-mode MRM. Even with optimized MRM settings, the signal is barely above the lower limit of detection (5X the noise floor). (*Middle*) Dephospho-CoA detected with positive-mode MRM with 200-fold more intensity than pantothenate. (*Bottom*) Pantothenate detected with negative-mode MRM with  $1 \times 10^3$  the signal intensity of positive-mode. All analytes were measured at 5 pmol/ $\mu$ L.



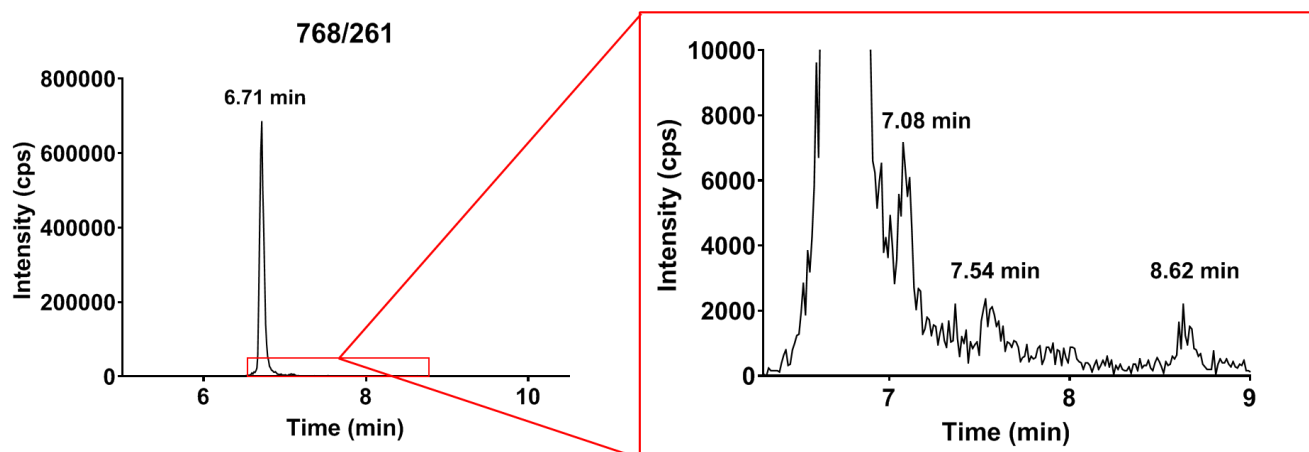

### Combined transitions

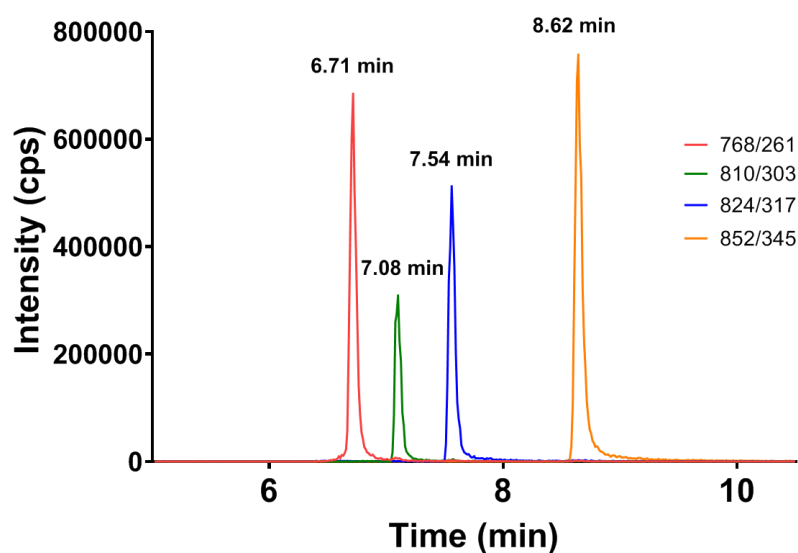

**Figure S3.** Free CoA is produced in the ESI source from acetyl, propionyl, and isovaleryl CoA: Standards were injected and the MRM channel associated with CoA (768/261) was monitored. Peaks of 768/261 were observed at 6.71 min, the retention time of CoA-SH (*top panel, left*); as well as at 7.08, 7.54, and 8.62 (*top panel, inset*). The retention times of 7.08, 7.54, and 8.62 were otherwise associated with dominant peaks for acetyl CoA (810/303), propionyl CoA (824/317), and isovaleryl CoA (852/345) (*bottom panel*).

**Table S2.** Determination of matrix effect

|                | Stds spiked in | Stds in post-extraction matrix (AUC) | Stds in extraction solvent (AUC) | Matrix effect (as % of stds in solvent) | Stds in postextraction matrix (pmol) | Stds in extraction solvent (pmol) | Comparative accuracy (as % of stds in solvent) |
|----------------|----------------|--------------------------------------|----------------------------------|-----------------------------------------|--------------------------------------|-----------------------------------|------------------------------------------------|
| Pantothenate   | 0              | 2000200.00                           | NA                               |                                         | 105.32                               | NA                                |                                                |
|                | 62.50          | 2978250.00                           | 1031450.00                       | 94.82                                   | 182.39                               | 57.04                             | 135.11                                         |
|                | 250.00         | 5579000.00                           | 3958250.00                       | 90.41                                   | 283.53                               | 218.39                            | 81.60                                          |
|                | 1000.00        | 22342500.00                          | 20840000.00                      | 97.61                                   | 1156.25                              | 1043.00                           | 100.76                                         |
| Dephospho CoA  | 0              | 0                                    | NA                               |                                         | 0.00                                 | NA                                |                                                |
|                | 62.50          | 30205.00                             | 38385.00                         | 78.69                                   | 63.40                                | 77.09                             | 82.25                                          |
|                | 250.00         | 135900.00                            | 156750.00                        | 86.70                                   | 267.73                               | 301.91                            | 88.68                                          |
|                | 1000.00        | 550125.00                            | 682450.00                        | 80.61                                   | 1098.18                              | 1207.27                           | 90.96                                          |
| CoA -SH        | 0              | 75627.50                             | NA                               |                                         | 81.13                                | NA                                |                                                |
|                | 62.50          | 119425.00                            | 51492.50                         | 85.06                                   | 130.94                               | 55.22                             | 90.20                                          |
|                | 250.00         | 286650.00                            | 226825.00                        | 93.03                                   | 288.80                               | 242.39                            | 85.68                                          |
|                | 1000.00        | 1033325.00                           | 1026500.00                       | 93.30                                   | 1053.57                              | 1009.71                           | 96.31                                          |
| Acetyl CoA     | 0              | 3271.00                              | NA                               |                                         | 13.80                                | NA                                |                                                |
|                | 62.50          | 14167.50                             | 11860.50                         | 91.87                                   | 73.65                                | 59.98                             | 99.77                                          |
|                | 250.00         | 43103.33                             | 40760.00                         | 97.72                                   | 216.27                               | 203.50                            | 99.49                                          |
|                | 1000.00        | 194200.00                            | 219600.00                        | 86.94                                   | 968.80                               | 1078.55                           | 88.54                                          |
| Propionyl CoA  | 0              | 22780.00                             | NA                               |                                         | 22.73                                | NA                                |                                                |
|                | 62.50          | 86710.00                             | 55222.50                         | 115.77                                  | 80.58                                | 50.80                             | 113.85                                         |
|                | 250.00         | 264150.00                            | 226025.00                        | 106.79                                  | 234.62                               | 215.40                            | 98.37                                          |
|                | 1000.00        | 1036000.00                           | 1143500.00                       | 88.61                                   | 938.00                               | 992.67                            | 92.20                                          |
| Isovaleryl CoA | 0              | 3540.00                              | NA                               |                                         | 3.87                                 | NA                                |                                                |
|                | 62.50          | 62860.00                             | 58707.50                         | 101.04                                  | 65.78                                | 60.87                             | 101.70                                         |
|                | 250.00         | 278800.00                            | 269425.00                        | 103.48                                  | 269.16                               | 277.80                            | 96.89                                          |
|                | 1000           | 1198000.00                           | 1189400.00                       | 100.72                                  | 1175.00                              | 1134.14                           | 103.60                                         |
| Malonyl CoA    | 0              | 0                                    | NA                               |                                         | 0.00                                 | NA                                |                                                |
|                | 62.50          | 11617.50                             | 10444.75                         | 111.23                                  | 59.48                                | 52.99                             | 112.24                                         |
|                | 250.00         | 48592.50                             | 47407.50                         | 102.50                                  | 226.30                               | 239.18                            | 94.62                                          |
|                | 1000.00        | 225525.00                            | 258450.00                        | 87.26                                   | 1060.25                              | 1177.55                           | 90.04                                          |
| Succinyl CoA   | 0              | 8135.75                              | NA                               |                                         | 90.02                                | NA                                |                                                |
|                | 62.50          | 12180.00                             | 4675.00                          | 86.51                                   | 162.20                               | 64.24                             | 112.35                                         |
|                | 250.00         | 25990.00                             | 19500.00                         | 91.56                                   | 326.15                               | 258.43                            | 91.37                                          |
|                | 1000.00        | 88582.50                             | 74340.00                         | 108.21                                  | 1089.95                              | 883.25                            | 113.21                                         |

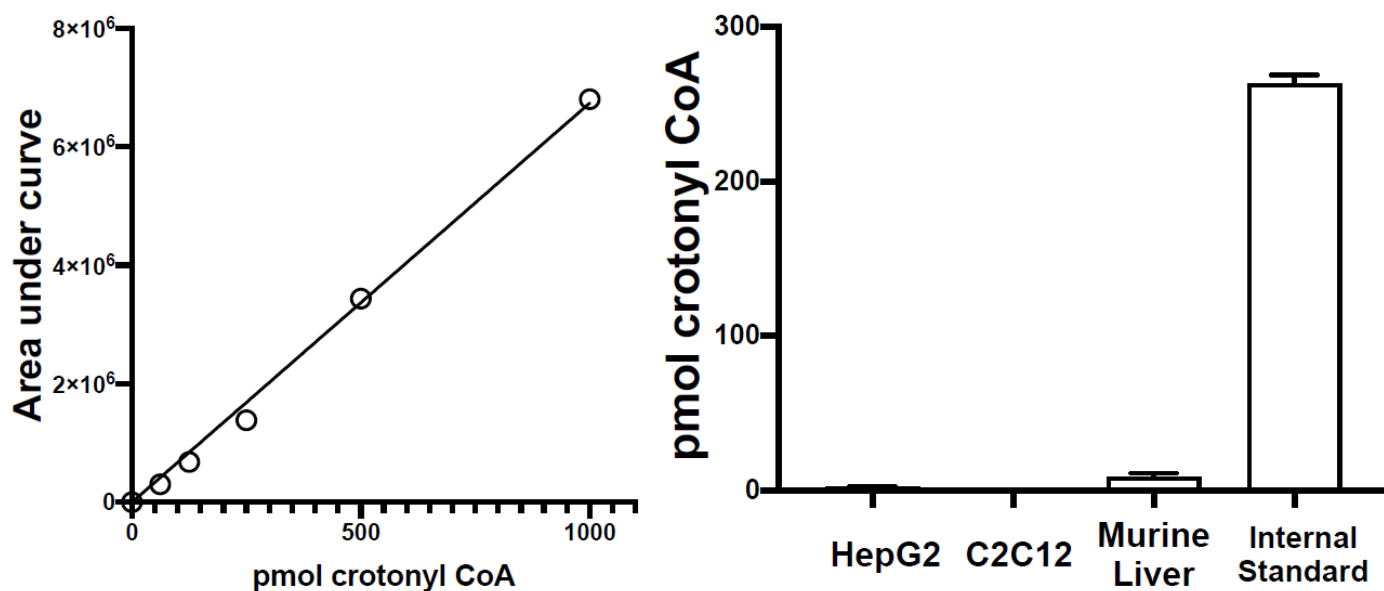

**Figure S4.** Endogenous crotonoyl CoA concentrations are significantly below the amount of crotonoyl CoA utilized as an internal standard for the proposed method. (*Left*). Increasing concentrations of crotonoyl CoA were spiked into 200 $\mu$ L of extraction solution and analyzed via LC-MS/MS. The calibration curve was generated by plotting the area under the curve for crotonoyl CoA against the amount of analyte contained in 200 $\mu$ L of extraction solution. (*Right*) The abundance of endogenous crotonoyl CoA was determined for  $6 \times 10^6$  HepG2 cells,  $8 \times 10^8$  C2C12 cells, and 5mg murine liver tissue and compared to a blank sample spiked with 1 $\mu$ M crotonoyl CoA as an internal standard. Cell lines had endogenous crotonoyl CoA levels less than 1% of the internal standard, and less than 3% for murine liver. Data are presented as mean  $\pm$  standard error of the mean (S.E.M.) for  $n^32$  technical replicates.
